# Supplementary material for: Language Differences at 12 Months in Infants Who Develop Autism Spectrum Disorder
Source: Springer Nature journal article supplement (doi:10.1007/s10803-015-2632-1), 2015-10-17
Supplement: MOESM1 [file 834966]

**Appendix A**

**Data Analysis Supplementary Information**

**Rasch Model**

The one parameter Item Response Theory (IRT) or Rasch model posits that the probability of correct responding *i* on an item *u* for person *j* is given by the expression (Rasch, 1980; Reise and Waller 2003):

P1PL(uij = 1│θi, bj) = (Equation 1)

With probability *i* being a function of person’s ability *θ* and item’s difficulty level *b* (Embretson and Reise 2000). The term *e* = 2.71828 reflects the Euler number and the constant D = 1.702 is implemented in order to place the item on the normal ogive metric. The Rasch model assumes equal slopes for the items, or in other words the fact that the relationship between person ability and item difficulty is constant across items (Crocker and Algina 1986). Graphically, the relationship between a person’s ability and the difficulty of the item is described by the Item Characteristic Curve (ICC) with curves reflecting probability levels of success (vertical axis) given certain levels of ability (horizontal axis).

**Differential Item Functioning**

The test for DIF involves the equivalence of slopes between populations estimated as follows:

(Equation 2)

which tests the hypothesis that all difficulty parameters *D* with standard errors *S.E.* are equivalent across items *L* (Hambleton, Swaminathan, and Rogers 1991). The formula for uniform DIF is essentially a t-test of the location parameters *δ* between two groups as shown below[[1]](#footnote-1):

(Equation 3)

with, d1 and d2, being the location estimates for the two groups and Si1 and Si2 the respective standard errors (Mellenbergh 1989). The estimated difference is distributed as Student’s t-statistic with a critical value of 1.96 for a 5% level of significance. Given the problem of relying on an inferential statistic, particularly in the presence of excessive power, an effect size indicator was employed to identify meaningful DIF estimates. Wang and Chen (2004) proposed using the t-value as an estimate of effect size (they termed it the Standardized Mean Difference estimate). They reported through simulations that the standardized mean difference (SMD) estimate strongly resembles Cohen’s d statistic (Cohen 1995) and recommended that large effects involve SMD values greater than 1.00. This cutoff criterion was implemented in the present study as an index of significant DIF. Tables 1 and 2 present findings for only the words that exceeded our cutoff criterion of a large effect (SMD > 1.0).

**Differential Test Functioning**

The procedure introduced by Penfield (2005) involves estimating of the variance estimate of the total test score and was approximated using the following formula:

(Equation 4)

Where the log (αMHi) is the natural logarithm of the Mantel-Haenszel common odds ratio for the *i*th item of an instrument, s2 being the variance of the log (αMHi) and μ being the mean of log (αMHi) across items n of an instrument. Conventions on effect size suggest that variance estimates greater than .14 are likely indicative of significant DTF.

**Appendix B**

Annotated program for computing a Monte-Carlo simulation in estimating power of the Rasch model in MPLUS 6.11. Factor loadings have been fixed to unity due to the equal slope requirement of the Rasch model. Item difficulties were left free to vary.

TITLE: Simulation for Rasch model. .!Title of project

MONTECARLO: !Command for generating data/simulations

NAMES ARE u1-u200; !Names of items

NOBSERVATIONS = 346; !N-size

CATEGORICAL = u1-u200; !Definition of categorical variables

GENERATE=u1-u200(1); !Generation of dichotomous items

NREPS = 500; !Number of replications

SEED = 1245; !Random seed number for replication

ANALYSIS: ESTIMATOR IS ML; !Type of estimation method ML=Max. Likelihood

LINK IS LOGIT; !Logit-Link function for dichotomous data

MODEL POPULATION: !Model definition statement

f1 BY u1-u200*1 (loading); !Equality of factor loadings

[u1$1-u200$1*-2]; !Item difficulties set to -2 logits

[f1@0]; f1@1; !Factor mean is zero, variance 1

MODEL: f1 BY u1-u200*1 (loading); !same as the population model above

[u1$1-u200$1*-2]; !same as the population model above

[f1@0]; f1@1; !same as the population model above

OUTPUT: STANDARDIZED(ALL); !Production of standardized Estimates

1. The t-test represents the most common method for identifying Differential Item Functioning (DIF). Other available procedures involve comparisons of areas between two ICCs (Raju, van der Linden, and Fleer, 1995), the comparison of variances of the ICCs (Penfield, 2005), and others. [↑](#footnote-ref-1)
